# Supplementary material for: A Hydroxytricyanopyrrole-Based Fluorescent Probe for Sensitive and Selective Detection of Hypochlorous Acid
Source: MDPI journal article supplement (doi:10.3390/molecules27217237), 2022-10-25
Supplement: s1 [file s1]

# Molecules

## Supplementary Materials

### A Hydroxytricyanopyrrole-Based Fluorescent Probe for Sensitive and Selective Detection of Hypochlorous Acid

Chunhua Zeng <sup>1,2,3,#</sup>, Zhengjun Chen <sup>1,2,3,#</sup>, Mingyan Yang <sup>1,2,3</sup>, Jiajia Lv <sup>1,2,3</sup>, Hongyu Li <sup>1,2,3</sup>, Jie Gao <sup>1,2,3,\*</sup> and Zeli Yuan <sup>1,2,3,\*</sup>

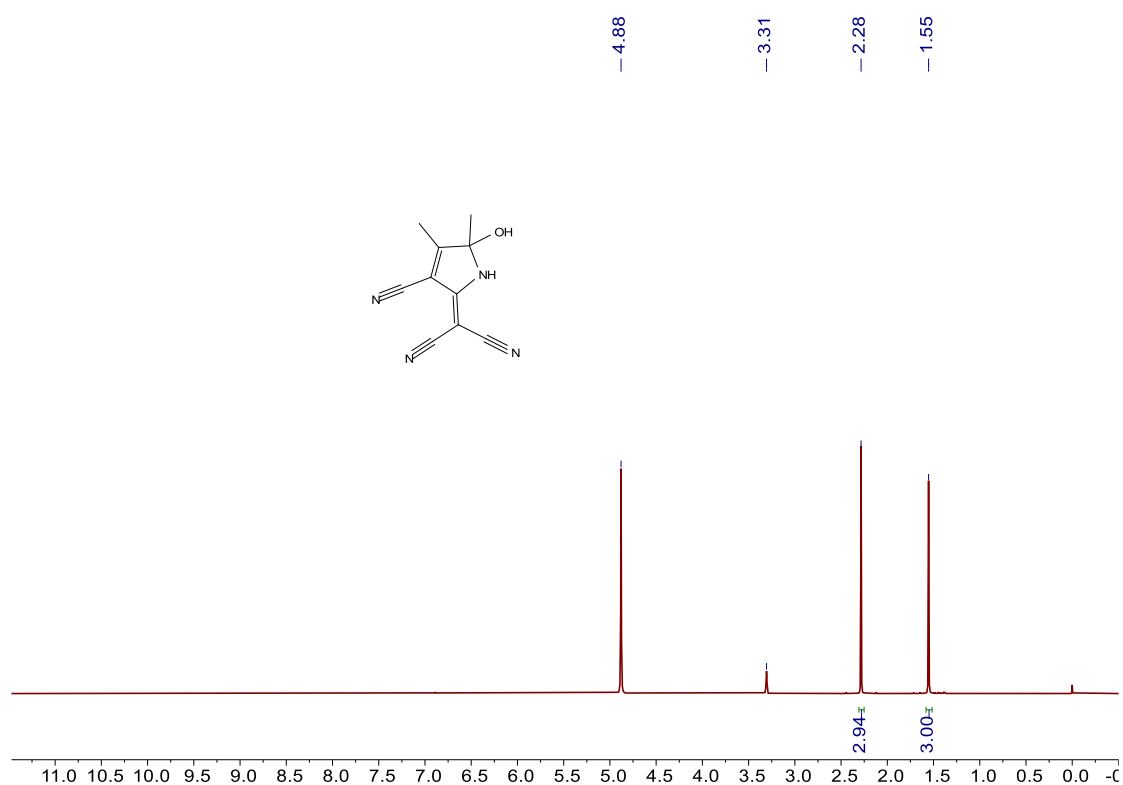

**Figure S1** <sup>1</sup>H NMR spectrum of HTCP in CD<sub>3</sub>OD

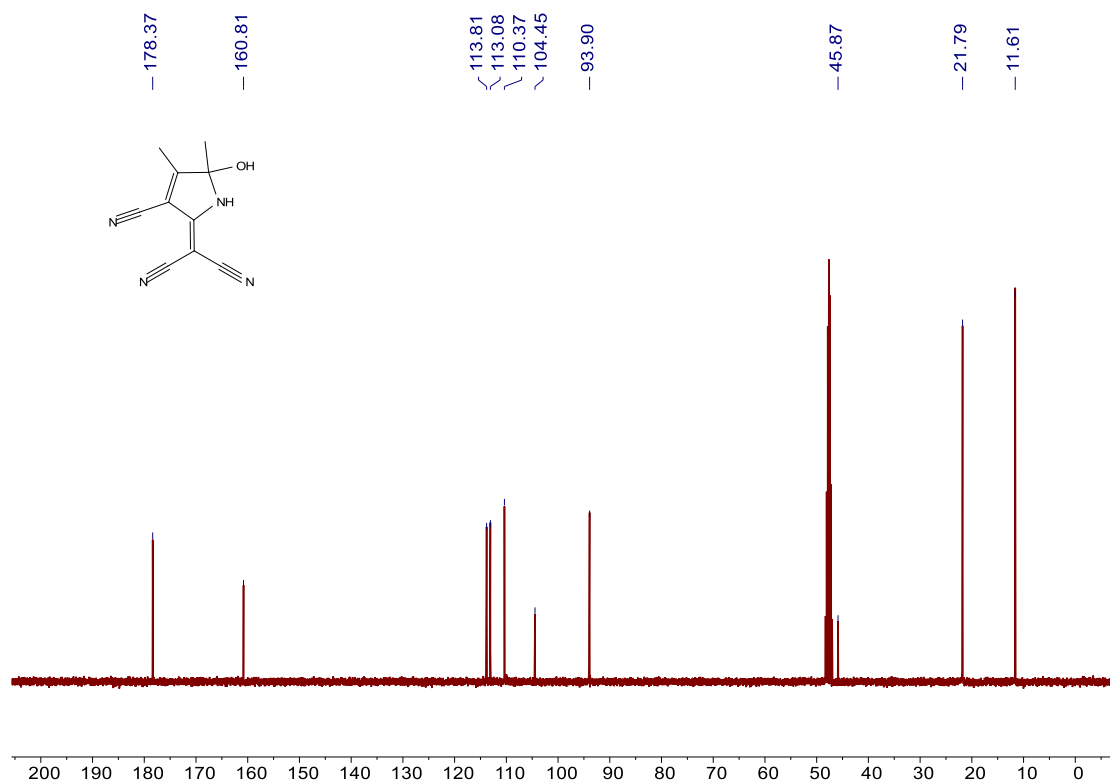

**Figure S2**  $^{13}\text{C}$  NMR spectrum of HTCP in  $\text{CD}_3\text{OD}$

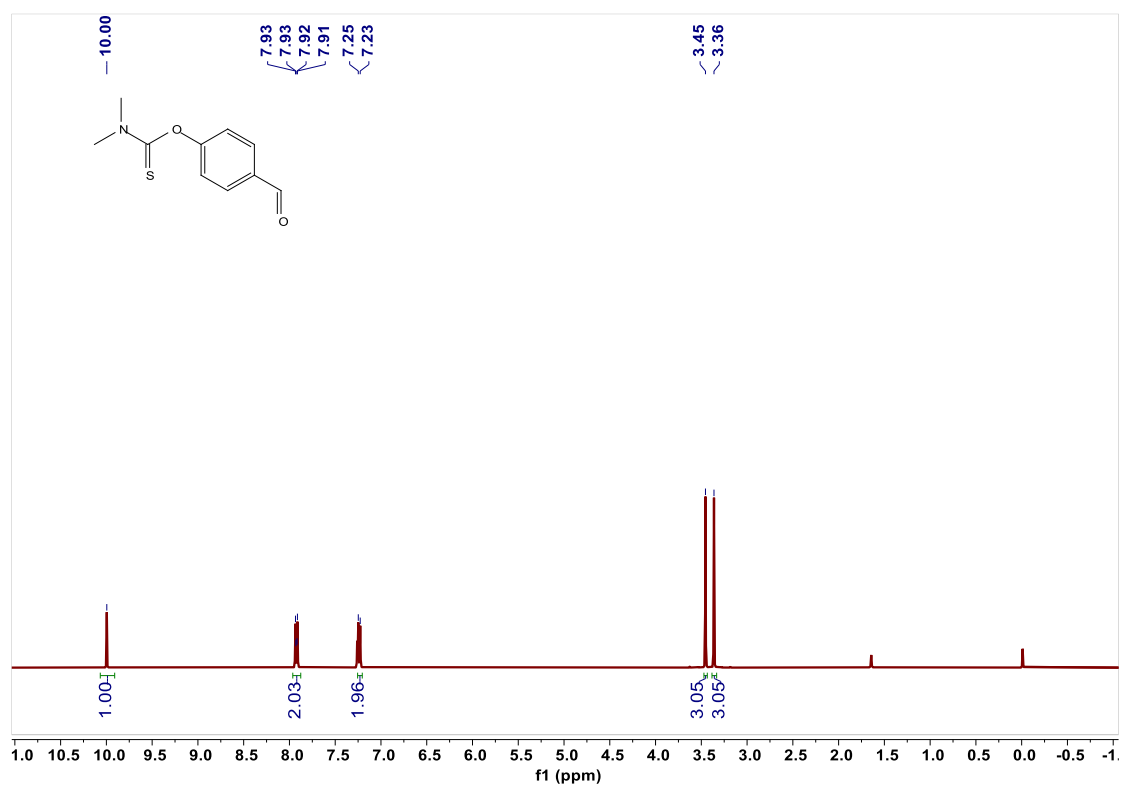

**Figure S3**  $^1\text{H}$  NMR spectrum of NTC in  $\text{CDCl}_3$

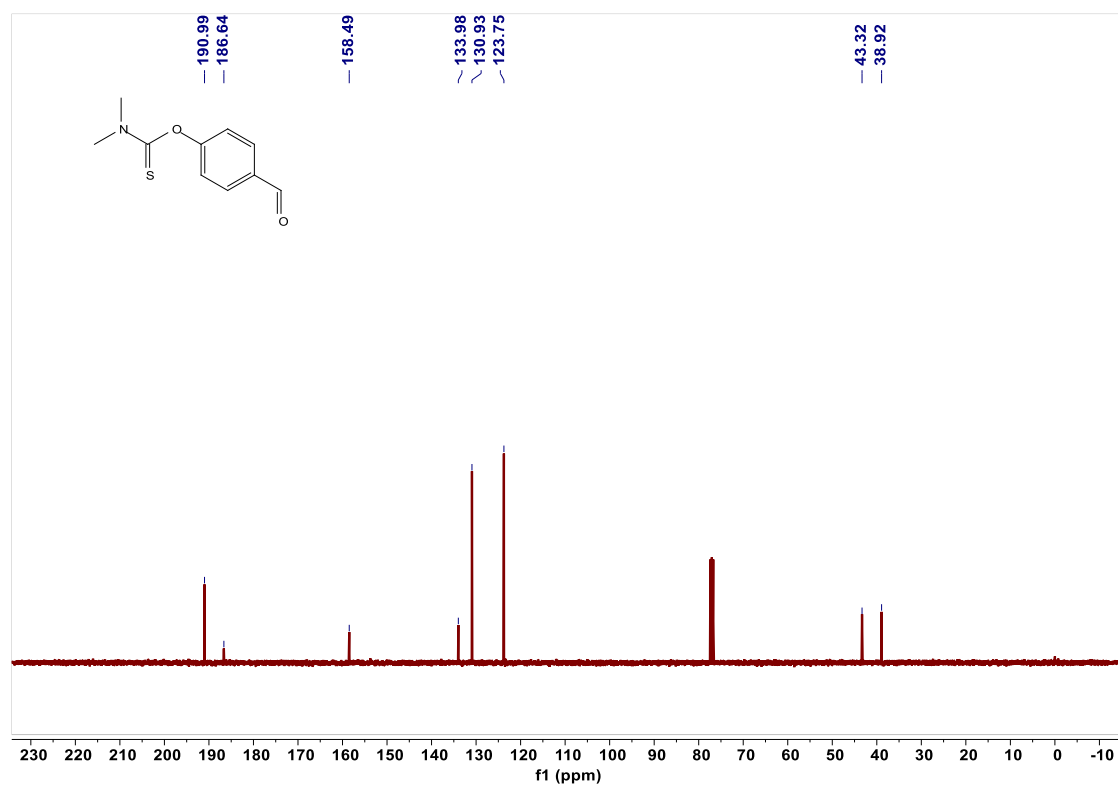

**Figure S4**  $^{13}\text{C}$  NMR spectrum of NTC in  $\text{CDCl}_3$

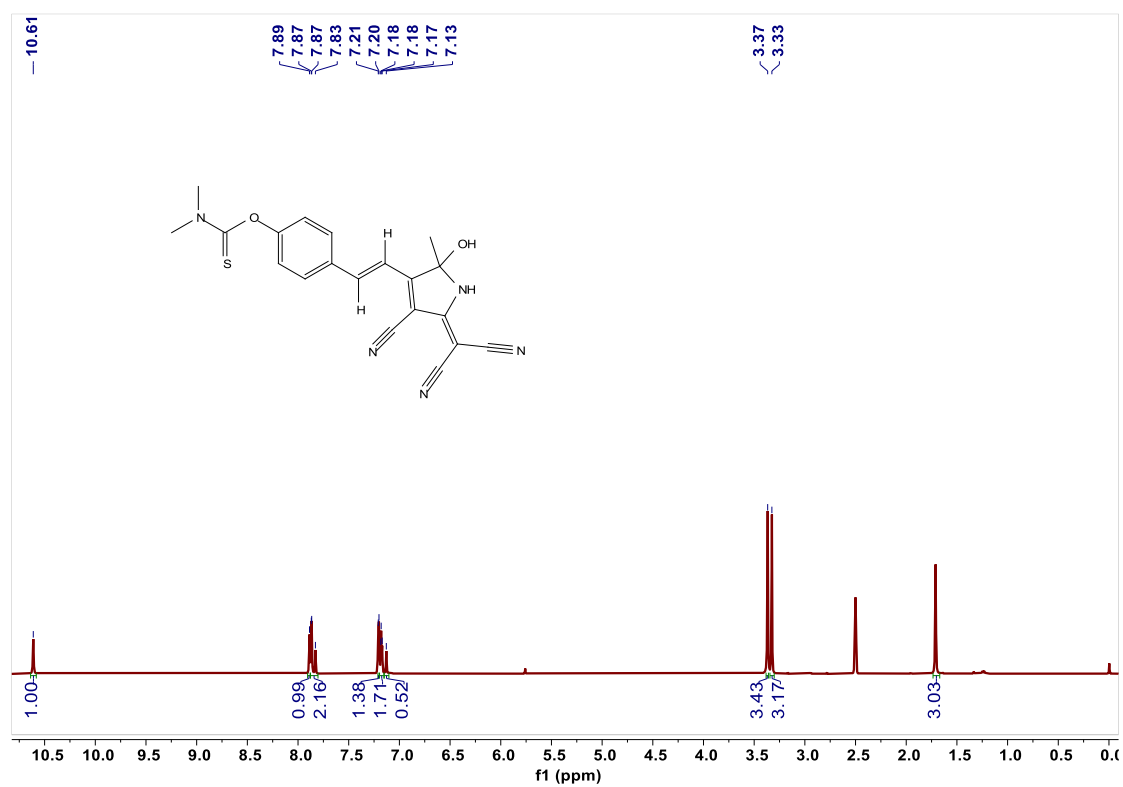

**Figure S5**  $^1\text{H}$  NMR spectrum of HTCP-NTC in  $\text{DMSO}-d_6$

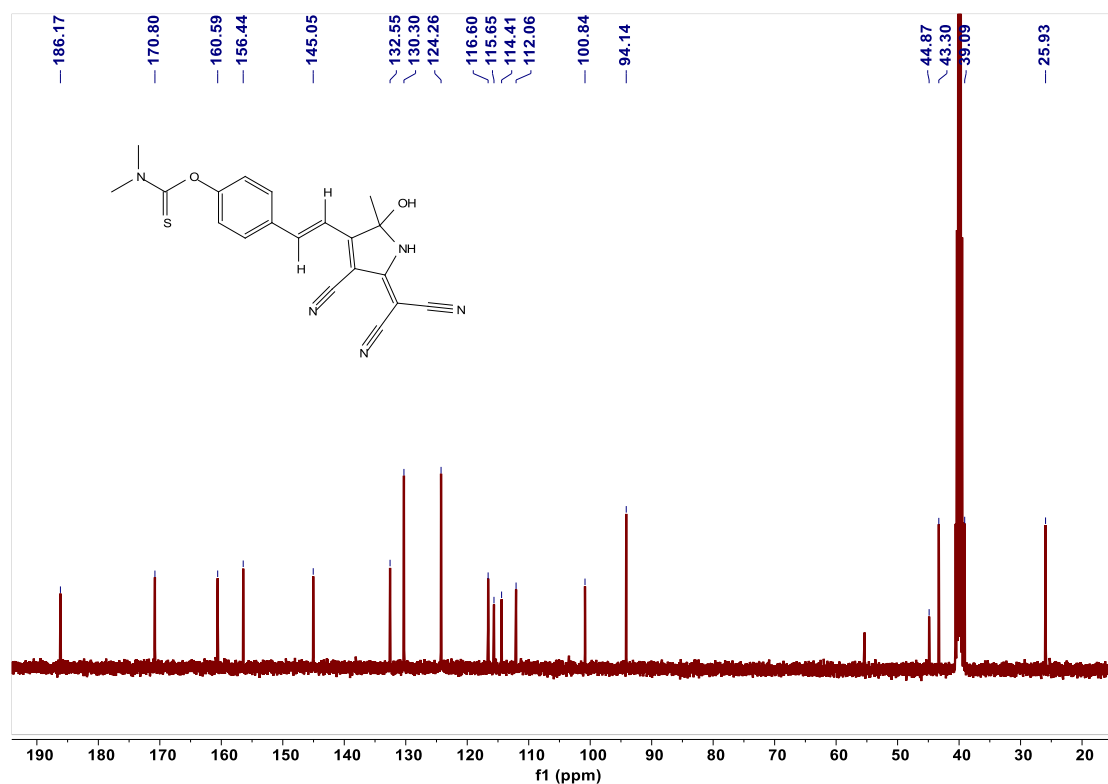

Figure S6 <sup>13</sup>C NMR spectrum of HTCP-NTC in DMSO-*d*<sub>6</sub>

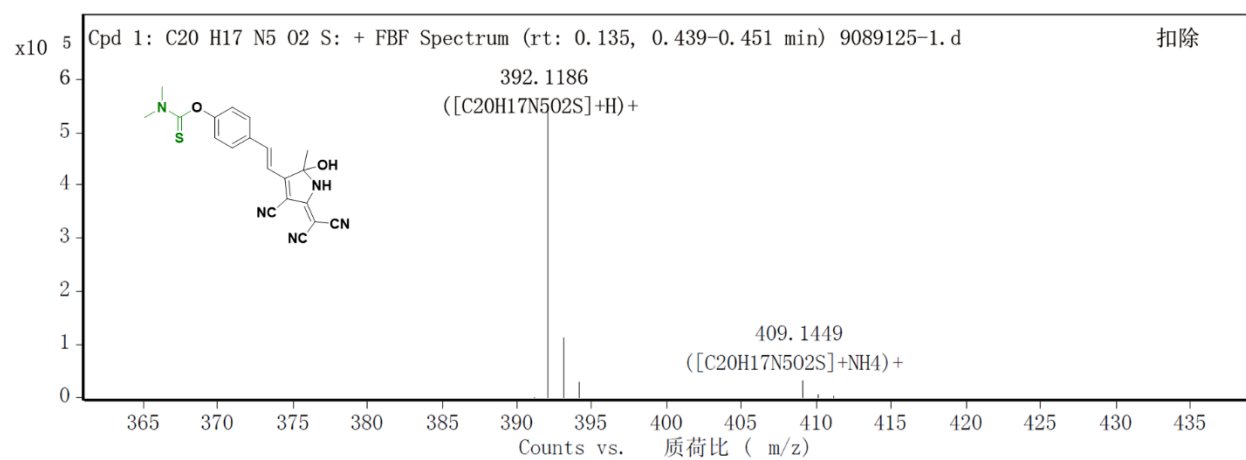

Figure S7 ESI-Mass spectrum of HTCP-NTC

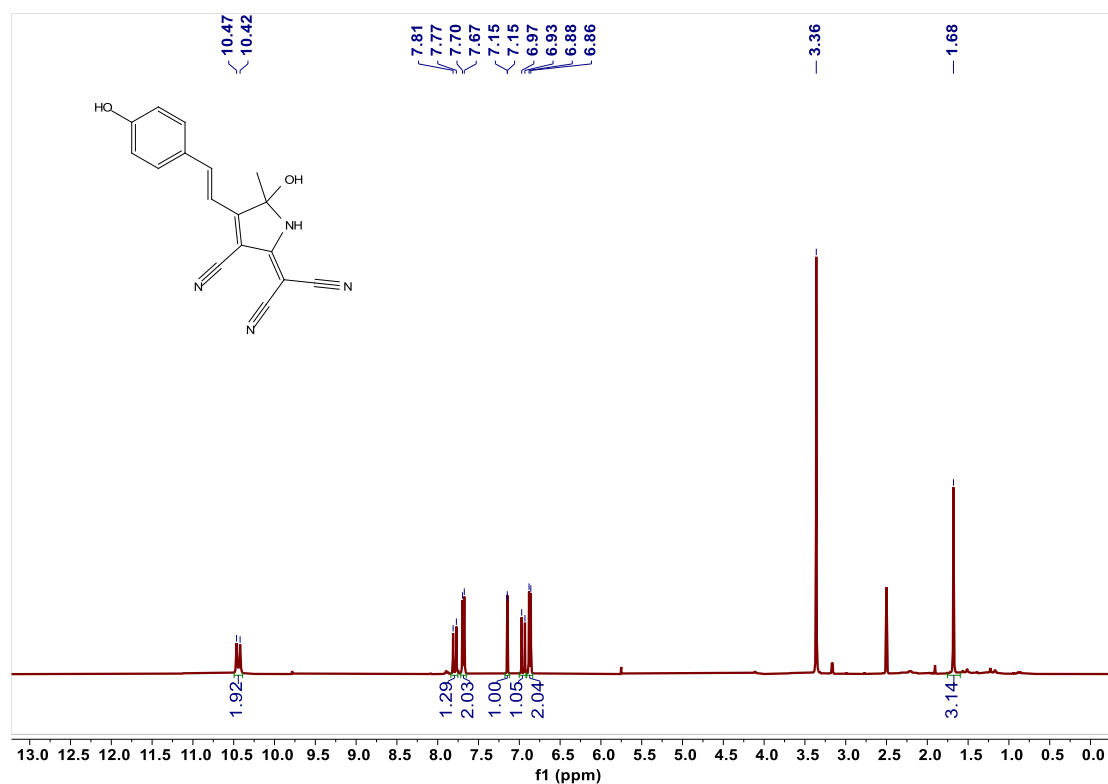

**Figure S8** <sup>1</sup>H NMR spectrum of HTCP-OH in DMSO-*d*<sub>6</sub>

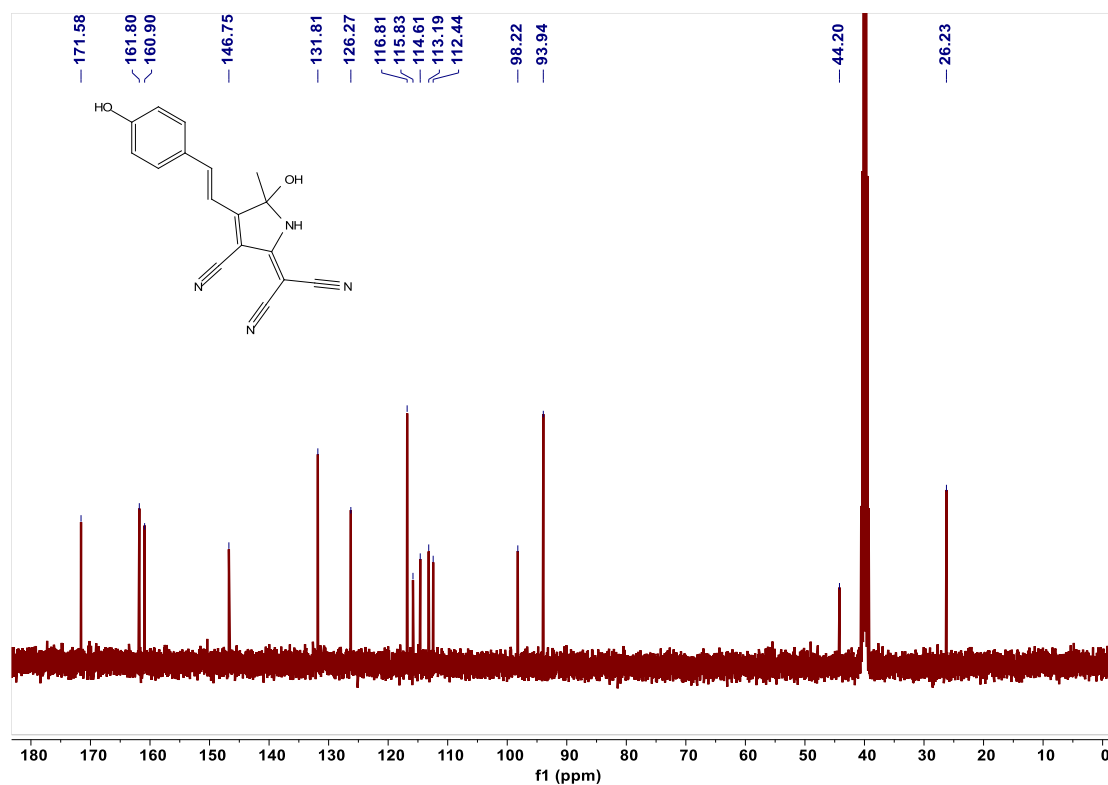

**Figure S9** <sup>13</sup>C NMR spectrum of HTCP-OH in DMSO-*d*<sub>6</sub>

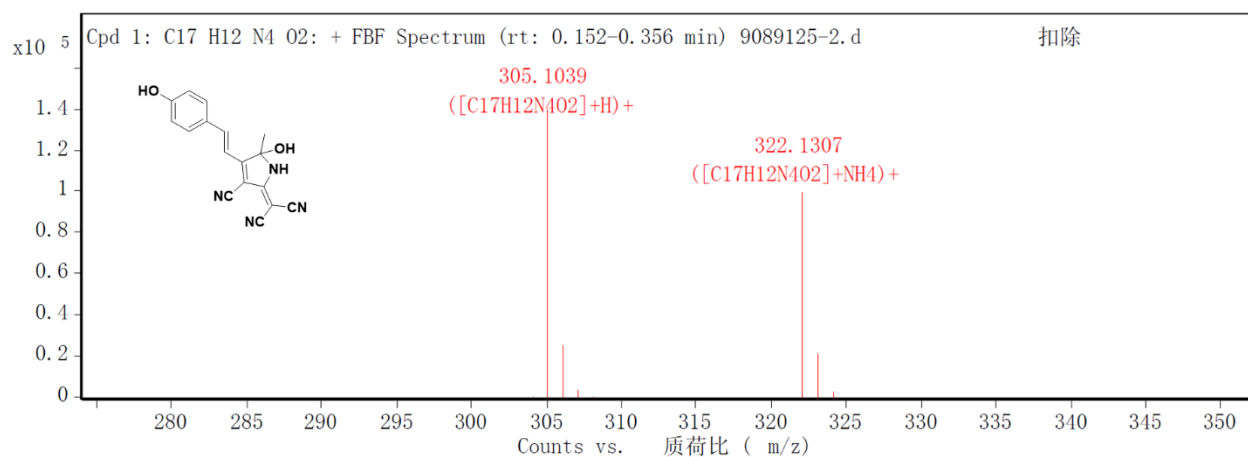

**Figure S10** ESI-Mass spectrum of the compound HTCP-OH

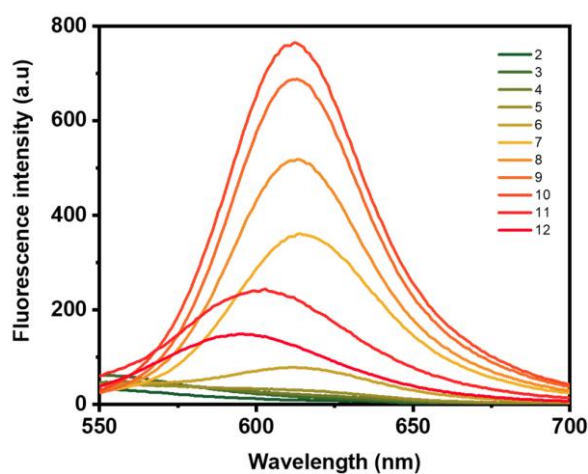

**Figure S11** Fluorescence emission spectra of HTCP-NTC (10  $\mu$ M) with HOCl (20  $\mu$ M) in PBS buffer solution (10 mM, containing 1% EtOH) at different pH. ( $\lambda_{ex} = 520$  nm)

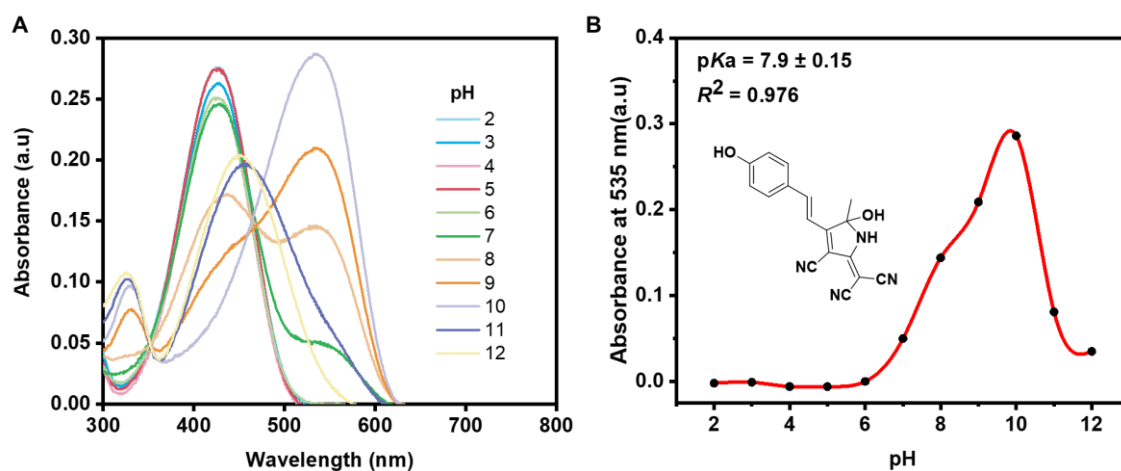

**Figure S12** (A) The absorbance changes at different pH (2-12) for HTCP-OH. (B) The pKa fitting curve of HTCP-OH.

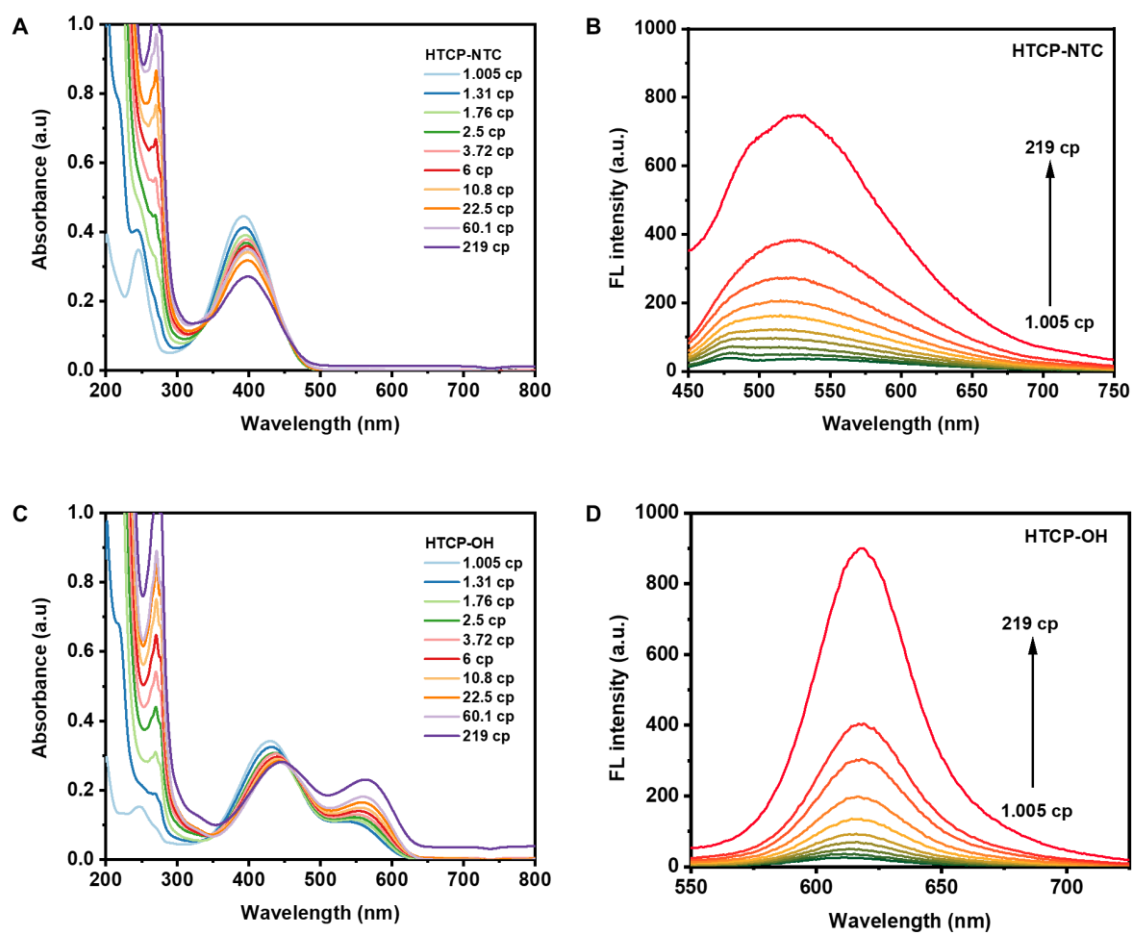

**Figure S13** The absorption and fluorescence changes for HTCP-NTC (10  $\mu$ M) (A, B) and HTCP-OH (10  $\mu$ M) (C, D) in various viscosity (PBS 7.4/glycerol system).

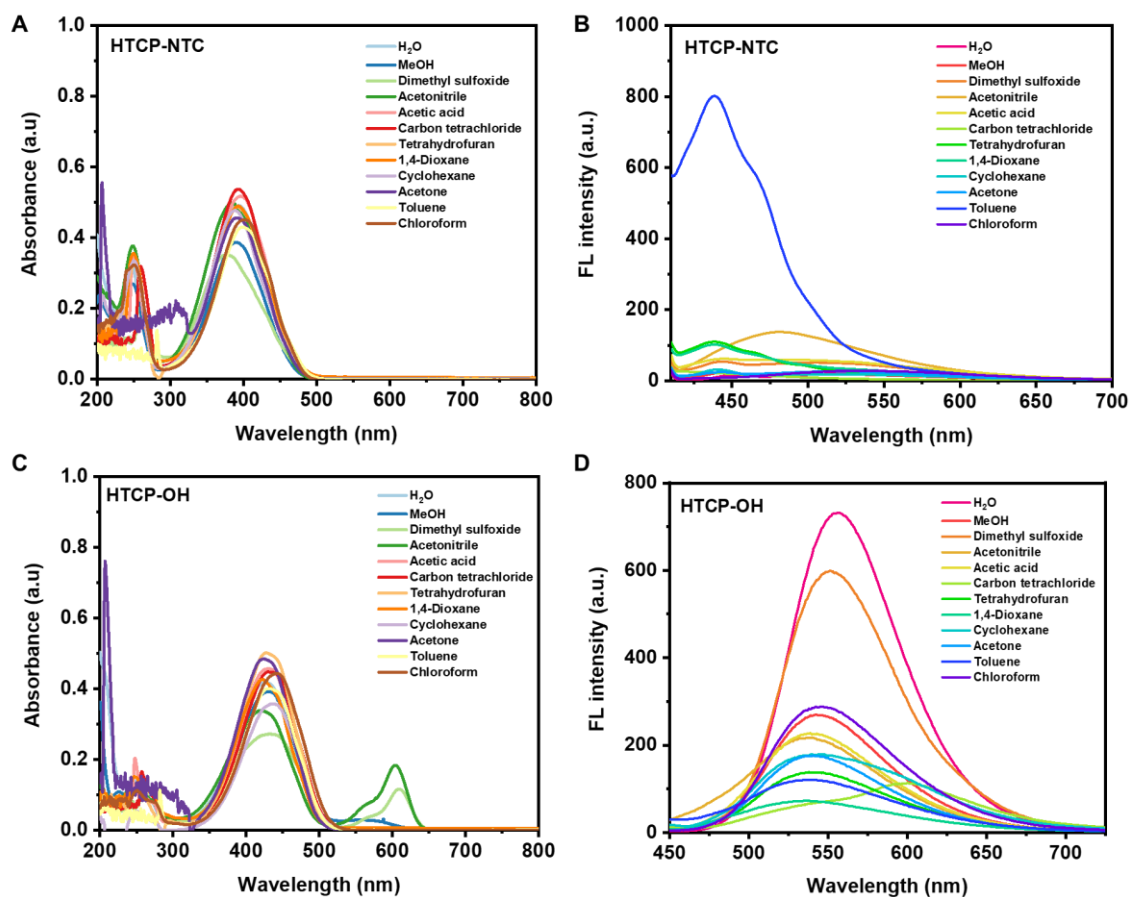

**Figure S14** The absorption and fluorescence changes for HTCP-NTC (10  $\mu$ M) (A, B) and HTCP-OH (10  $\mu$ M) (C, D) in solvents of different polarity.



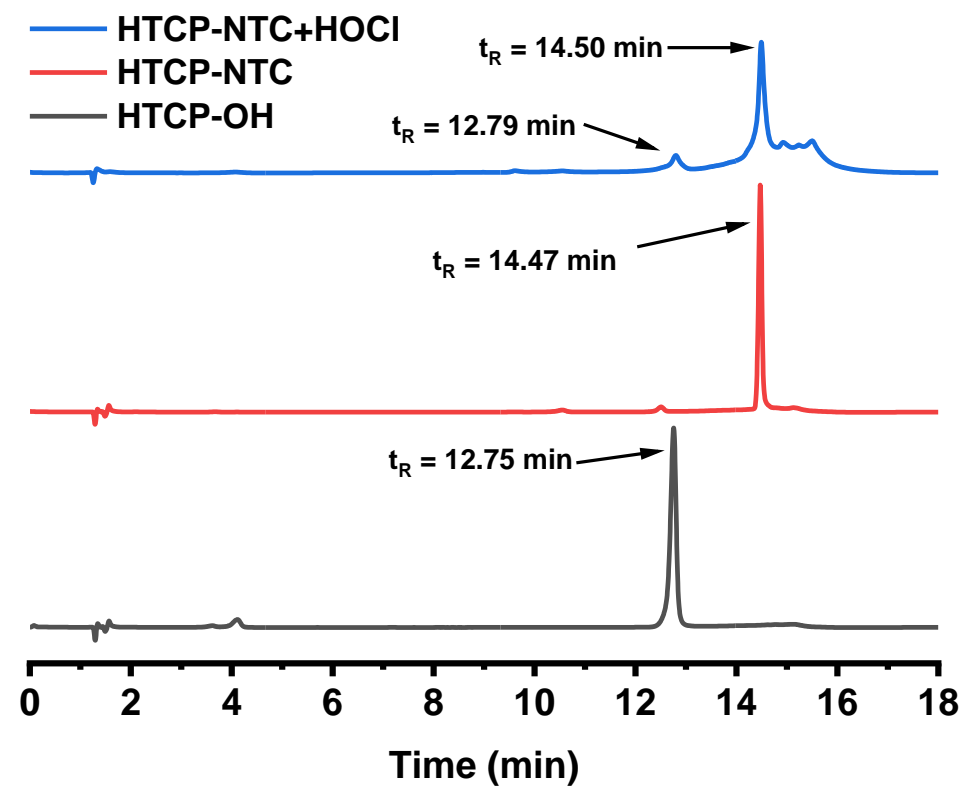

**Figure S15** HPLC analysis of HTCP-NTC, HTCP-OH, and the reaction solution of HTCP-NTC incubated with HOCl for 15 min.

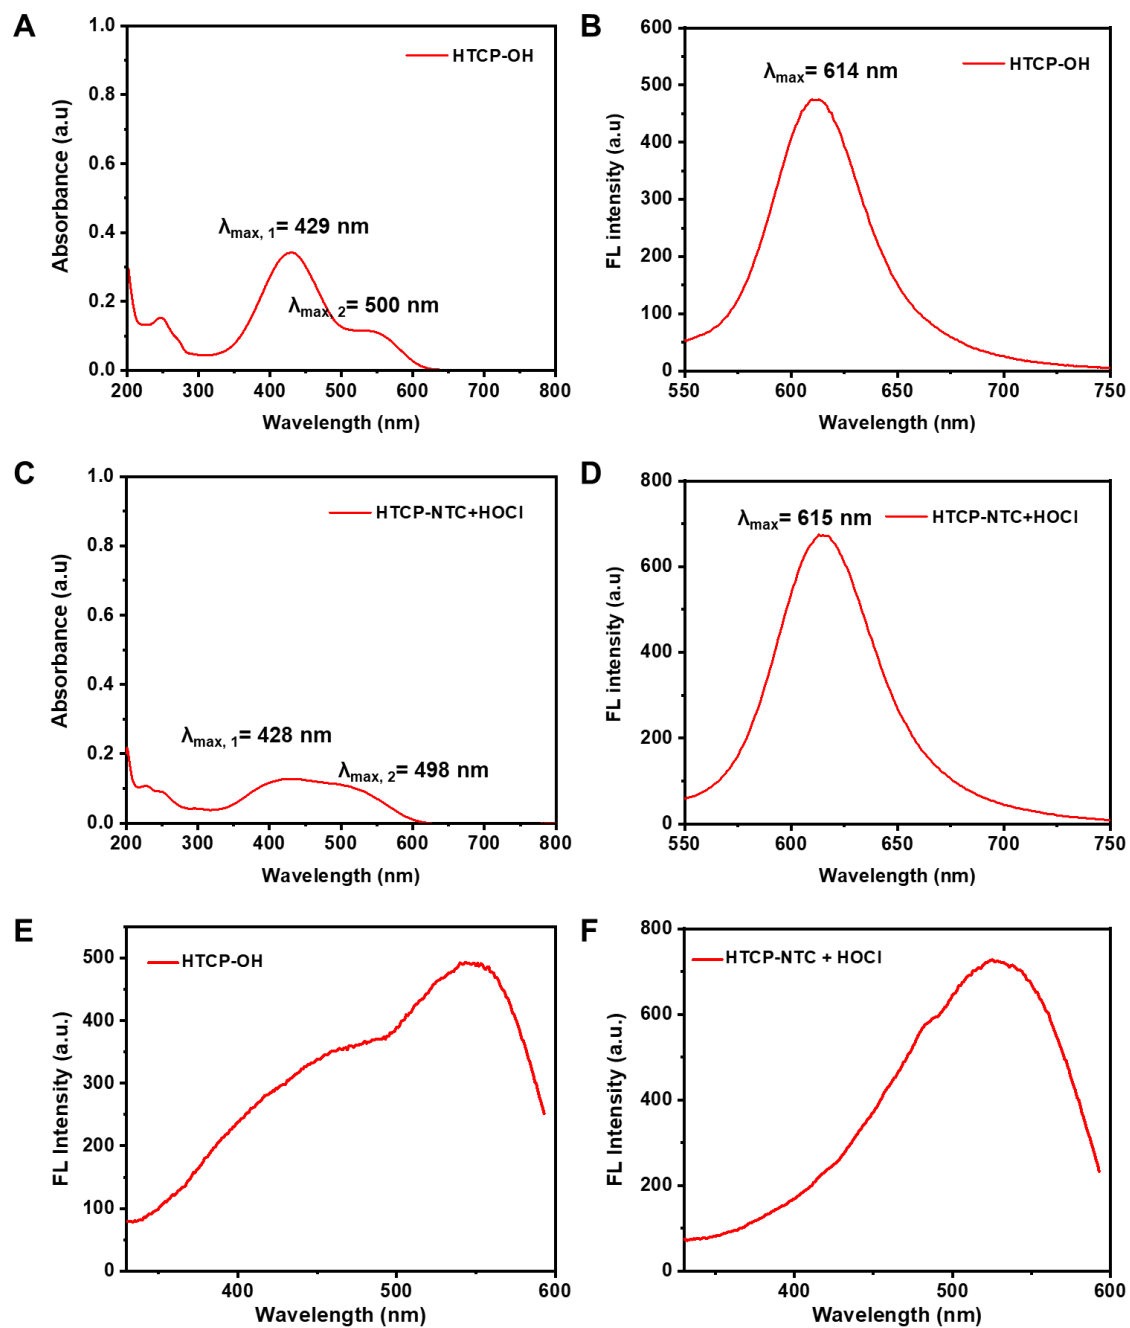

**Figure S16** The absorption, fluorescence emission and excitation spectra of HTCP-OH (A, B, and E) and the reaction mixtures for HTCP-NTC with HOCl (C, D, and F).

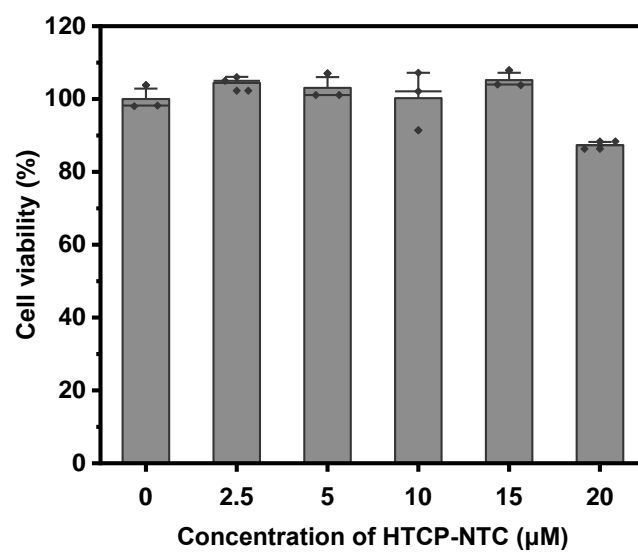

**Figure S17** The cell viability of RAW264.7 after 24 h incubation with HTCP-NTC  
(Mean  $\pm$  SD,  $n = 3$ )

**Table S1** The summary of photophysical properties of reported similar probes

| Probe                                                                               | $\lambda_{\text{ex}}$<br>(nm) | $\lambda_{\text{em}}$<br>(nm) | Stokes shift<br>(nm) | Detection<br>time | Response type | LOD                     | Ref. |
|-------------------------------------------------------------------------------------|-------------------------------|-------------------------------|----------------------|-------------------|---------------|-------------------------|------|
| 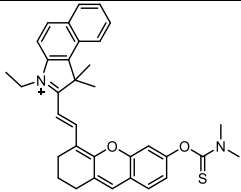   | 650 nm                        | 732 nm                        | 82                   | 30 s              | Off-On        | 35 nM                   | [1]  |
|    | 500                           | 529                           | 29                   | With 60 s         | Off-On        | 6.81 $\mu\text{M}$      | [2]  |
|   | 386/325                       | 607/500                       | 175                  | 30 s              | Ratiometric   | $3.34 \times 10^{-7}$ M | [3]  |
|  | 660                           | 680                           | 20                   | 4 min             | Off-On        | 20 nm                   | [4]  |
|  | 475                           | 500                           | 75                   | Within 60s        | Off-On        | 0.15 $\mu\text{M}$      | [5]  |

|                                                                                    |         |         |    |                |             |          |     |
|------------------------------------------------------------------------------------|---------|---------|----|----------------|-------------|----------|-----|
| 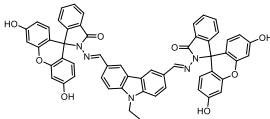  | 470     | 530     | 60 | within 1.5 min | Turn-on     | 0.056 μM | [6] |
|   | 378/362 | 500/432 | 70 | within 2 min   | Ratiometric | 0.02 μM  | [7] |
|   | 495     | 525     | 30 | 110 min        | Turn-on     | 0.27 μM  | [8] |
|  | 413     | 437     | 24 | 100 s          | Turn-on     | 0.15 μM  | [9] |

---

## References

- [1] Qian X, Yu H, Zhu W, et al. Near infrared fluorescent probe for in vivo bioimaging of endogenous hypochlorous acid[J]. *Dyes and Pigments*, 2021, 188:109218. DOI: 10.1016/j.dyepig.2021.109218.
- [2] Wang L, Li B, Jiang C, et al. A BODIPY Based Fluorescent Probe for the Rapid Detection of Hypochlorite[J]. *Journal of Fluorescence*, 2018, 28(4):933–941. DOI: 10.1007/s10895-018-2255-y.
- [3] Tang X, Zhu Z, Liu R, et al. A novel ratiometric and colorimetric fluorescent probe for hypochlorite based on cyanobiphenyl and its applications[J]. *Spectrochimica acta. Part A, Molecular and Biomolecular Spectroscopy*, 2019, 219:576–581. DOI: 10.1016/j.saa.2019.04.042.
- [4] Mao G-J, Liang Z-Z, Bi J, et al. A near-infrared fluorescent probe based on photostable Si-rhodamine for imaging hypochlorous acid during lysosome-involved inflammatory response[J]. *Analytica Chimica Acta*, 2019, 1048:143–153. DOI: 10.1016/j.aca.2018.10.014.
- [5] Ning Y, Cui J, Lu Y, et al. De novo design and synthesis of a novel colorimetric fluorescent probe based on naphthalenone scaffold for selective detection of hypochlorite and its application in living cells[J]. *Sensors and Actuators B: Chemical*, 2018, 269:322–330. DOI: 10.1016/j.snb.2018.04.156.
- [6] Wang N, Xu W, Song D, et al. A fluorescein-carbazole-based fluorescent probe for imaging of endogenous hypochlorite in living cells and zebrafish[J]. *Spectrochimica Acta. Part A, Molecular and Biomolecular Spectroscopy*, 2020, 227:117692. DOI: 10.1016/j.saa.2019.117692.
- [7] Xu C, Wu T, Duan L, et al. A naphthalimide-derived hypochlorite fluorescent probe from ACQ to AIE effect transformation[J]. *Chemical Communications*, 2021, 57(86):11366–11369. DOI: 10.1039/d1cc04157f.
- [8] Cheng W, Ren C, Liu S, et al. A highly selective A- $\pi$ -A “turn-on” fluorescent probe for hypochlorite in tap water[J]. *New Journal of Chemistry*, 2022. DOI: 10.1039/D2NJ01792J.
- [9] Shelar D S, Malankar G S, M. M, et al. Selective detection of hypochlorous acid in living cervical cancer cells with an organoselenium-based BOPPY probe[J]. *New Journal of Chemistry*, 2022, 46(36):17610–17618. DOI: 10.1039/D2NJ02956A.
